# Supplementary material for: Design and synthesis of a tetracyclic tripeptide mimetic frozen in a polyproline type II (PP2) helix conformation
Source: Royal Society of Chemistry journal article supplement (doi:10.1039/d2ob01857h), 2022-01-01
Supplement: d2ob01857h1.pdf [file d2ob01857h1.pdf]

## Design and Synthesis of a Tetracyclic Tripeptide Mimetic Frozen in a Polyproline Type II (PP2) Helix Conformation

### Supporting Information

|                                                                        |           |
|------------------------------------------------------------------------|-----------|
| <b>1. Assigned NMR data for compounds 1, 14, 15, 16, 17, 19 and 20</b> | ..... S2  |
| <b>2. Depicted NMR spectra</b>                                         | ..... S7  |
| <b>3. Crystal structure and structure refinement data</b>              | ..... S19 |

### 1.1. Assigned NMR data for compound 1 (Boc-[ProM-19]-OMe)

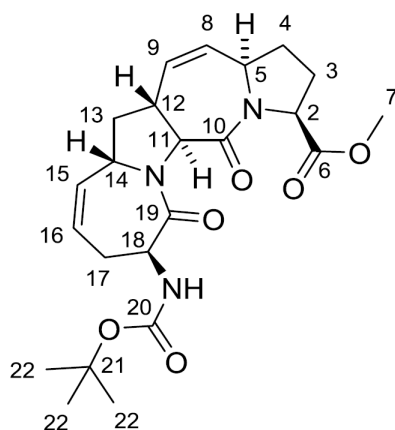

**<sup>1</sup>H NMR** (500 MHz, CDCl<sub>3</sub>):  $\delta$  (ppm) = 5.86 – 5.79 (m, 2H, H-9, H-16), 5.70 – 5.65 (m, 1H, H-15), 5.61 – 5.56 (m, 1H, H-8), 4.78 – 4.67 (m, 3H, H-2, H-11, H-5/14), 4.64 – 4.59 (m, 1H, H-5/14), 4.34 – 4.29 (m, 1H, H-18), 2.99 – 2.90 (m, 1H, H-12), 2.73 (br, 1H, NH), 2.61 – 2.54 (1H, H-17), 2.42 (dt,  $J = 11.6, 5.7$  Hz, 1H, H-13), 2.36 – 2.29 (m, 1H, H-4), 2.17 – 2.00 (m, 2H, H-3), 1.95 – 1.80 (m, 1H, H-4), 1.72 – 1.63 (m, 1H, H-13), 1.45 (s, 10 H, H-17, H-22).

**<sup>13</sup>C-NMR** (125 MHz, CDCl<sub>3</sub>):  $\delta$  (ppm) = 172.5 (s, C-6), 170.8 (s, C-19), 168.7 (s, C-18), 155.4 (s, C-20), 130.0 (d, C-8), 128.8 (d, C-15), 128.0 (d, C-9, C-16), 79.7 (s, C-21), 64.6 (d, C-11), 59.4 (d, C-2), 57.5; 57.3 (d, C-5, C-14), 52.3 (q, C-7), 40.1 (t, C-13), 37.5 (d, C-12), 33.0 (t, C-4), 29.2 (t, C-17), 28.3 (q, C-22), 27.0 (d, C-3).

### 1.2. Assigned NMR data for compound 14

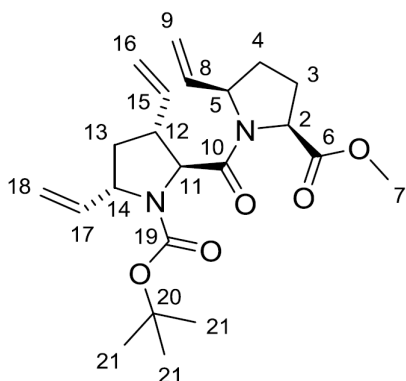

**<sup>1</sup>H NMR** (600 MHz, CDCl<sub>3</sub>; mixture of rotamers):  $\delta$  (ppm) = 5.95 – 5.88 (m, 1H, H-8), 5.87 – 5.75 (m, 1H, H-15), 5.82 – 5.74 (m, 1H, H-17), 5.45 (m, 1H, H-9), 5.13 (m, 1H, H-9), 5.02 (m, 1H, H-1), 5.02 (m, 1H, H-18), 4.97 (m, 2H, H-16, H-18), 4.90 – 4.84 (t, 0.65H, H-5<sub>rot1</sub>), 4.57 – 4.55 (m, 0.7H, H-5<sub>rot2</sub>, H-14<sub>rot2</sub>), 4.52 – 4.47 (m, 1H, H-2), 4.41 – 4.38 (m, 0.65H, H-14<sub>rot1</sub>), 4.34 (m, 0.65H, H-11<sub>rot1</sub>), 4.30 (m, H-11<sub>rot2</sub>), 3.74; 3.72 (2x s, 3H, H-7), 2.85 – 2.79 (m, 1H, H-12), 2.73 – 2.64 (m, 1H, H-13), 2.27 – 2.11 (m, 2H, H-3, H-4), 2.01 – 1.80 (m, 2H, H-3, H-4), 1.64 – 1.60 (m, 1H, H-13), 1.39; 1.37 (2x s, 9H, H-21).

**<sup>13</sup>C NMR** (125 MHz, CDCl<sub>3</sub>):  $\delta$  (ppm) = 172.8; 172.6; 172.5; 172.2 (s, C-6, C-10), 154.9; 153.9 (s, C-19), 141.0; 140.5 (d, C-17), 139.9; 139.7 (d, C-15), 138.6; 138.2 (d, C-8), 117.2; 116.7

(t, C-9), 115.1 (t, C-16), 114.1; 113.8 (t, C-18), 79.8 (s, C-20), 63.5; 63.2 (d, C-11), 61.2; 61.0 (d, C-14), 60.8, 60.7 (d, C-5), 60.0; 59.8 (d, C-2), 52.2; 52.0 (q, C-7), 46.7; 45.7 (d, C-12), 37.5; 36.2 (t, C-13), 32.9; 32.6 (t, C-4), 28.5; 28.3; 28.2 (q, C-21), 26.9; 26.9 (t, C-3).

### 1.3. Assigned NMR data for compound 15

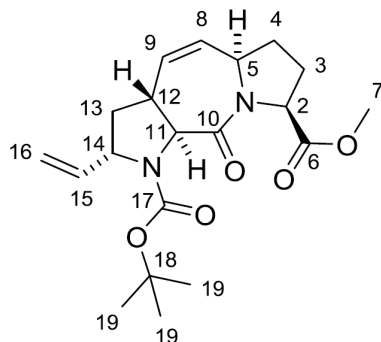

**<sup>1</sup>H NMR** (500 MHz, CDCl<sub>3</sub>; mixture of rotamers):  $\delta$  (ppm) 5.85 – 5.74 (m, 1.25H, H-9, H-15<sub>rot2</sub>), 5.66 (ddd,  $J = 17.0, 10.1, 8.3$  Hz, 0.75H, H-15<sub>rot1</sub>), 5.55 (ddd,  $J = 11.2, 2.9, 1.6$  Hz, 1H, H-8), 5.26 – 4.97 (m, 2H, H-16), 4.80 (dd,  $J = 7.8, 2.8$  Hz, 0.75H, H-2<sub>rot1</sub>), 4.73 – 4.62 (m, 1.25H, H-2<sub>rot2</sub>, H-5), 4.50 (dd,  $J = 25.5, 10.6$  Hz, 1H, H-11), 4.32 (ddd,  $J = 10.5, 8.1, 5.6$  Hz, 0.25H, H-14<sub>rot2</sub>), 4.25 (ddd,  $J = 10.3, 8.3, 5.7$  Hz, 0.75H, H-14<sub>rot1</sub>), 3.69 (s, 0.75H, H-7<sub>rot2</sub>), 3.68 (s, 2.25H, H-7<sub>rot1</sub>), 2.99 – 2.85 (m, 1H, H-12), 2.39 – 2.25 (m, 1H, H-4), 2.28 – 2.17 (m, 1H, H-13), 2.11 – 1.97 (m, 2H, H-3), 1.96 – 1.80 (m, 1H, H-4), 1.59 – 1.46 (m, 1H, H-13), 1.41 (s, 6H), 1.38 (s, 2H).

**<sup>13</sup>C NMR** (100 MHz, CDCl<sub>3</sub>; mixture of rotamers):  $\delta$  (ppm) = 172.5; 172.3 (s, C-6), 169.7/169.1 (s, C-10), 154.2/153.0 (s, C-17), 140.0/138.8 (d, C-15), 129.6/129.3 (d, C-8), 128.9/128.6 (d, C-9), 115.1/114.7 (t, C-16), 80.0/79.6 (s, C-18), 63.2/62.8 (d, C-11), 61.8/61.5 (d, C-14), 59.5/59.4 (d, C-2), 57.1 (d, C-5), 52.3/52.1 (q, C-7), 39.7/39.5 (t, C-13), 39.2/39.1 (d, C-12), 33.1/33.0 (t, C-4), 28.3/28.1 (q, C-19), 27.2/27.0 (t, C-3).

#### 1.4. Assigned NMR data for compound 16

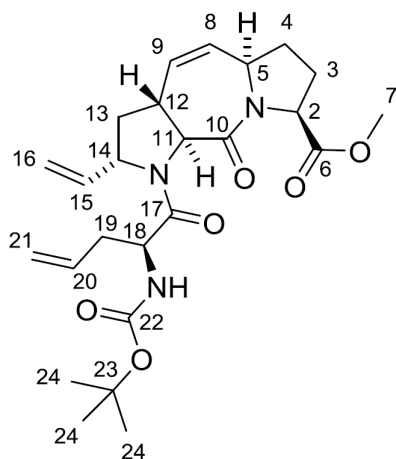

**<sup>1</sup>H NMR** (500 MHz, CDCl<sub>3</sub>, data for main rotamer):  $\delta$  (ppm) = 5.97 – 5.84 (m, 1.4H, H-15, H-20), 5.79 (dt,  $J$  = 11.2, 2.2 Hz, 1H, H-9), 5.75 – 5.64 (m, 0.6H, H-15, H-20), 5.63 – 5.54 (m, 1H, H-8), 5.43 – 5.22 (m, 2H, H-16), 5.18 – 5.04 (m, 2H, H-21), 4.93 – 4.89 (m, 1H, H-18), 4.78 – 4.76 (m, 1H, H-2), 4.74 – 4.70 (m, 2H, H-5, H-11), 4.42 – 4.37 (m, 1H, H-14), 3.74 – 3.67 (m, 3H, H-7), 2.99 – 2.91 (m, 1H, H-12), 2.55 – 2.50 (m, 1H, H-19), 2.41 – 2.31 (m, 3H, H-4, H-13, H-19), 2.11 – 2.00 (m, 2H, H-3), 1.91 – 1.80 (m, 1H, H-4), 1.70 – 1.65 (m, 1H, H-13).

**<sup>13</sup>C NMR** (125 MHz, CDCl<sub>3</sub>, data for main rotamer):  $\delta$  (ppm) = 172.3 (s, C-6), 172.1 (s, C-17), 168.4 (s, C-10), 155.5 (s, C-22), 137.9 (d, C-15), 133.5 (d, C-20), 130.0 (d, C-8), 128.1 (d, C-9), 118.2 (t, C-16, C-21), 79.0 (s, C-23), 63.9 (d, C-11), 62.9 (d, C-14), 59.3 (d, C-2), 57.2 (d, C-5), 52.3 (q, C-7), 51.7 (d, C-18), 40.9 (t, C-13), 38.1 (d, C-12), 37.1 (t, C-19), 32.8 (t, C-4), 28.4 (q, C-24), 27.2 (t, C-3).

#### 1.5. Assigned NMR data for peptide 17

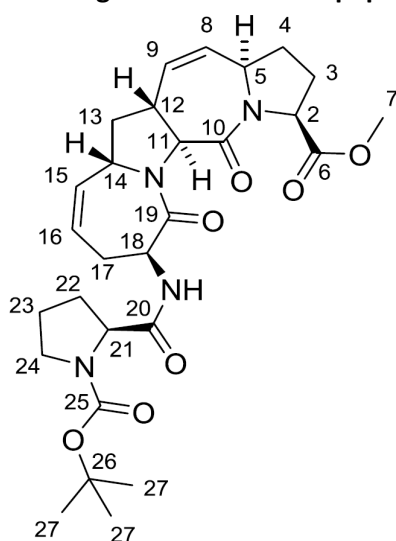

**<sup>1</sup>H NMR** (500 MHz, CDCl<sub>3</sub>, mixture of rotamers):  $\delta$  (ppm) = 7.67 (d,  $J$  = 7.6 Hz, 1H, NH), 6.04 – 5.55 (m, 4H, H-8, H-9, H-15, H-16), 4.82 – 4.15 (m, 6H, H-2, H-5, H-11, H-14, H-18, H-21), 3.69 (s, 3H, H-7), 3.54 – 3.22 (m, 2H, H-24), 2.98 – 2.90 (m, 1H, H-12), 2.71 – 1.61 (m, 12H, H-3, H-4, H-13, H-17, H-22, H-24), 1.42 (s, 9H, H-27).

## 1.6. Assigned NMR data for peptide 19

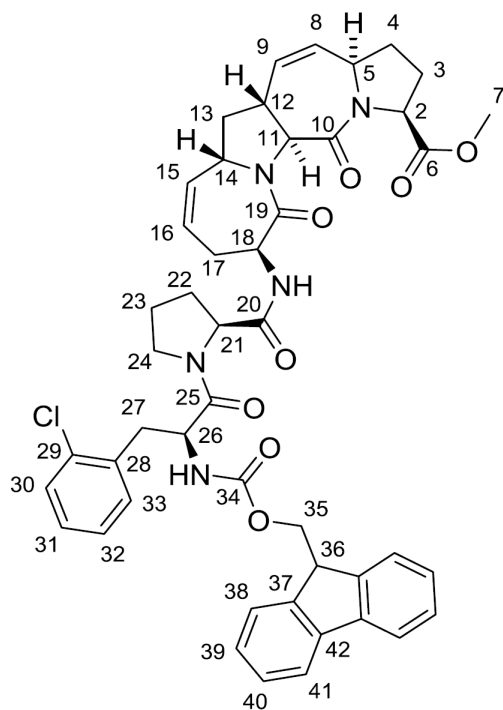

### <sup>1</sup>H NMR

(500 MHz, CDCl<sub>3</sub>, mixture of rotamers):  $\delta$  (ppm) = 7.74 – 7.72 (m, 2H, H-41), 7.53 – 7.11 (m, 8.3H, H-30, H-31, H-32, H-33, H-38, H-39, H-40, NH, CO<sub>2</sub>NH<sub>rot2</sub>), 4.89 (td, J = 9.1, 5.3 Hz, 0.7H, H-26<sub>rot1</sub>), 4.82 – 4.49 (m, 6.3H, H-2, H-5, H-11, H-14, H-18 H-21, H-26<sub>rot2</sub>), 5.90 – 5.67 (m, 3.7H, H-9, H-15, H-16, CO<sub>2</sub>NH<sub>rot1</sub>), 5.61 – 5.54 (m, 1H, H-8), 4.89 (td, J = 9.1, 5.3 Hz, 0.7H, H-26<sub>rot1</sub>), 4.75 – 4.50 (m, 6.3H, H-2, H-5, H-11, H-14, H-18, H-21, 26<sub>rot2</sub>), 4.26 (dd, J = 10.5, 7.2 Hz, 1H, H-35), 4.15 (dd, J = 10.5, 7.4 Hz, 1H, H-35), 4.11 – 4.03 (m, 1H, H-36), 3.68 (s, 3H, H-7), 3.71 – 3.44 (m, 0.3H, H-24<sub>rot2</sub>), 3.53 – 3.44 (m, 0.7H, H-24<sub>rot1</sub>), 3.31 (dd, J = 13.3, 6.7 Hz, 0.3H, H-27<sub>rot2</sub>), 3.20 (dd, J = 13.8, 5.3 Hz, 0.7H H-27<sub>rot1</sub>), 3.08 (dd, J = 13.1, 7.7 Hz, 0.3H H-27<sub>rot2</sub>), 2.99 (dd, J = 13.8, 9.3 Hz, 0.7H H-27<sub>rot1</sub>), 2.96 (br, 1H, H-12), 2.67 – 2.55 (m, 2H, H-17), 2.47 (dt, J = 11.6, 5.7 Hz, 1H, H-13), 2.41 – 1.81 (m, 8H, H-3, H-4, H-22, H-23), 1.69 (q, J = 12.2 Hz, 1H, H-13).

### <sup>13</sup>C NMR

(125 MHz, CDCl<sub>3</sub>, mixture of rotamers):  $\delta$  (ppm) = 172.4 (s, C-6), 171.2 (s, C-25), 170.5/170.1 (s, C-19, C-20), 168.4 (s C-10), 155.6 (s, C-34), 143.8/143.7 (s, C-37), 141.1 (s, C-42), 134.4/133.9 (s, C-28, C-29), 131.9 (d, C-33), 129.9/129.6/129.5/128.6/127.9 (d, C-8, C-9, C-15, C-16, C-30, C-32, C-33), 127.6 (d, C-40), 126.9 (d, C-39), 126.8 (d, C-31), 125.1; 125.0 (d, C-38), 119.9 (d, C-41), 66.9 (t, C-35), 64.5 (d, C-11), 60.0 (d, C-21), 59.3(d, C-2), 57.3; 57.0 (d, C-5, C-14), 53.6 (d, C-18), 52.2 (q, C-7), 51.9 (d, C-26), 47.4 (t, C-24), 47.0 (d, C-36), 40.1 (t, C-13), 37.4 (d, C-12), 37.0 (t, C-27), 32.9 (t, C-4), 29.1 (t, C-17), 27.5/27.0 (t, C-3, C-22), 25.0 (t, C-23).

## 1.7. Assigned NMR Data for peptide 20

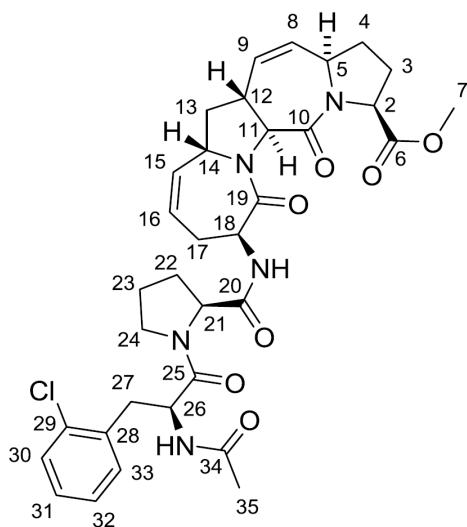

**<sup>1</sup>H NMR** (500 MHz, CDCl<sub>3</sub>, mixture of rotamers):  $\delta$  (ppm) = 7.62 (d,  $J$  = 9.6 Hz, 0.3H, NH-Ac<sub>rot2</sub>), 7.43 (d,  $J$  = 7.2 Hz, 0.7 H, NH<sub>rot1</sub>), 7.37 – 7.32 (m, 0.7H, Ar<sub>rot2</sub>), 7.23 – 7.15 (m, 2.6H, Ar), 7.15 – 7.08 (m, 0.7H, Ar), 6.98 (d,  $J$  = 8.5 Hz, 0.3H, NH<sub>rot2</sub>), 6.36 (d,  $J$  = 8.5 Hz, 0.7H, NH-Ac<sub>rot1</sub>), 5.90 – 5.79 (m, 2H, H-9, H-16), 5.78 – 5.68 (m, 1H, H-15), 5.65 – 5.55 (m, 1H, H-8), 5.09 (td,  $J$  = 8.7, 5.5 Hz, 0.7H, H-26<sub>rot1</sub>), 5.01 (td,  $J$  = 9.7, 5.0 Hz, 0.3H, H-26<sub>rot2</sub>), 4.80 – 4.67 (m, 4H, H-2, H-5, H-11, H-14, H-18<sub>rot2</sub>), 4.61 (td,  $J$  = 7.2, 3.3 Hz, 0.7H, H-18<sub>rot1</sub>), 4.56 – 4.48 (m, 1H, H-5<sub>rot2</sub> or H-14<sub>rot2</sub>, H-21<sub>rot1</sub>), 4.28 (d,  $J$  = 8.1 Hz, 0.3H, H-21<sub>rot2</sub>), 3.72 (q,  $J$  = 8.3 Hz, 0.7H, H-24<sub>rot1</sub>), 3.67 (s, 2.1H, H-7<sub>rot1</sub>), 3.59 (s, 0.9H, H-7<sub>rot2</sub>), 3.56 (m, 0.6H, H-24<sub>rot2</sub>), 3.50 – 3.40 (m, 1H, H-24<sub>rot1</sub>, H-27<sub>rot2</sub>), 3.15 (dd,  $J$  = 13.9, 5.5 Hz, 0.7H, H-27<sub>rot1</sub>), 3.05 – 2.91 (m, 1.7H, H-12, H-27<sub>rot1</sub>), 2.80 (dd,  $J$  = 13.6, 9.7 Hz, 0.3H, H-27<sub>rot2</sub>), 2.70 – 2.52 (m, 2H, H-17), 2.48 (m, 1H, H-13), 2.41 – 2.27 (m, 2H, H-4, H-22), 2.25 – 1.80 (m, 8.1H, H-3, H-4, H-22 H-23, H-35<sub>rot1</sub>), 1.77 – 1.63 (m, 1.9H, H-13, H-35<sub>rot2</sub>).

**<sup>13</sup>C NMR** (125 MHz, CDCl<sub>3</sub>, mixture of rotamers):  $\delta$  (ppm) = 172.4/171.8 (s, C-6), 171.3/171.3 (s, C-25), 170.5/170.4 (s, C-19), 171.1/ 170.1 (s, C-20), 170.1/169.5 (s, C-34), 169.1/168.4 (s, C-10), 135.4/134.0 (s, C-28), 134.4/134.4 (s, C-29), 132.0/131.7 (d, C-33), 130.0/129.8 (d, C-8), 129.5/129.5/129.3/128.6/128.1/127.9/127.8/127.5/126.8/126.2 (d, C-9, C-15, C-16, C-30, C-31, C-32), 64.7/64.5 (d, C-11), 60.7/60.1 (d, C-21), 59.6/ 59.3 (d, C-2), 57.7/57.4/57.1 (d, C-5, C-14), 53.7/52.7 (d, C-18), 52.4/52.2 (q, C-7), 51.0/50.2 (d, C-26), 47.5 (t, C-24), 40.3/40.1 (t, C-13), 37.4/37.3 (d, C-12), 36.4/35.9 (t, C-27), 32.9/ 32.8 (t, C-4), 29.7/29.1 (t, C-17), 27.5 (t, C-22), 27.0 (t, C-3), 25.0 (t, C-23), 23.0, 22.2 (t, C-35).

2.1.  $^1\text{H}$  (300 MHz,  $\text{CDCl}_3$ ) and  $^{13}\text{C}$  (75 MHz,  $\text{CDCl}_3$ ) spectra of 7a.

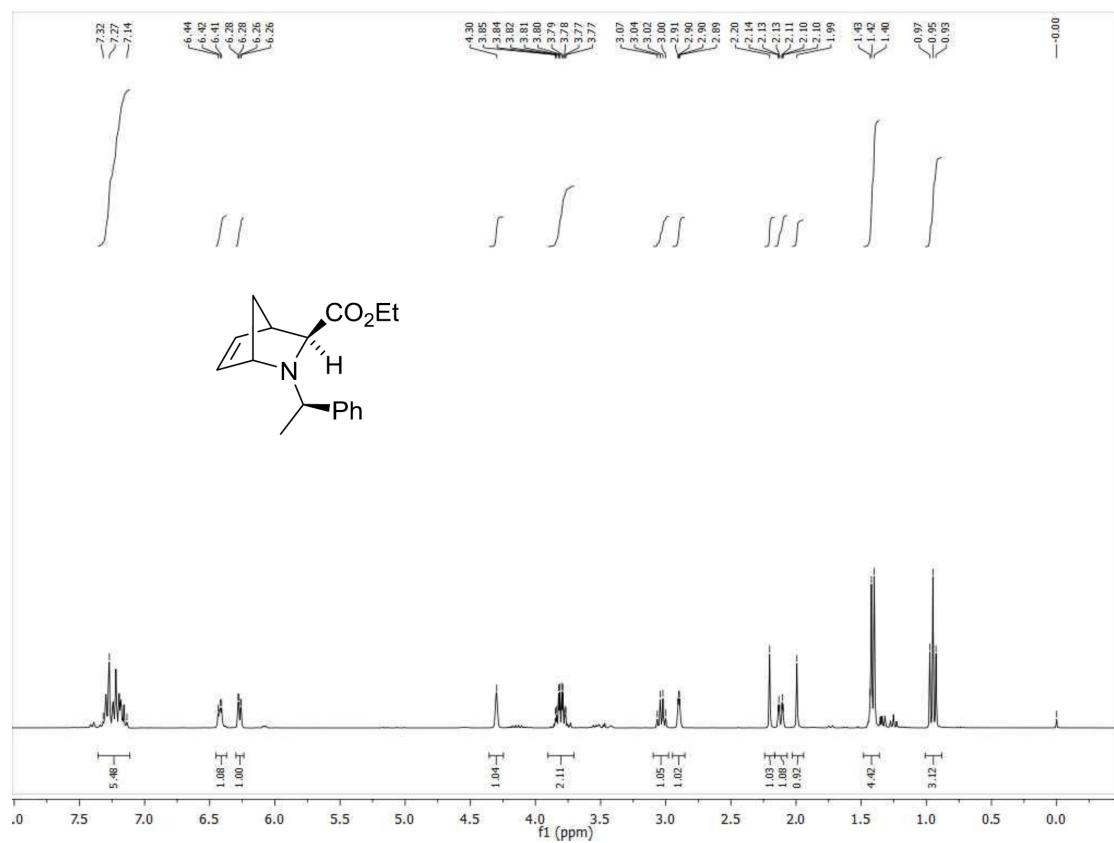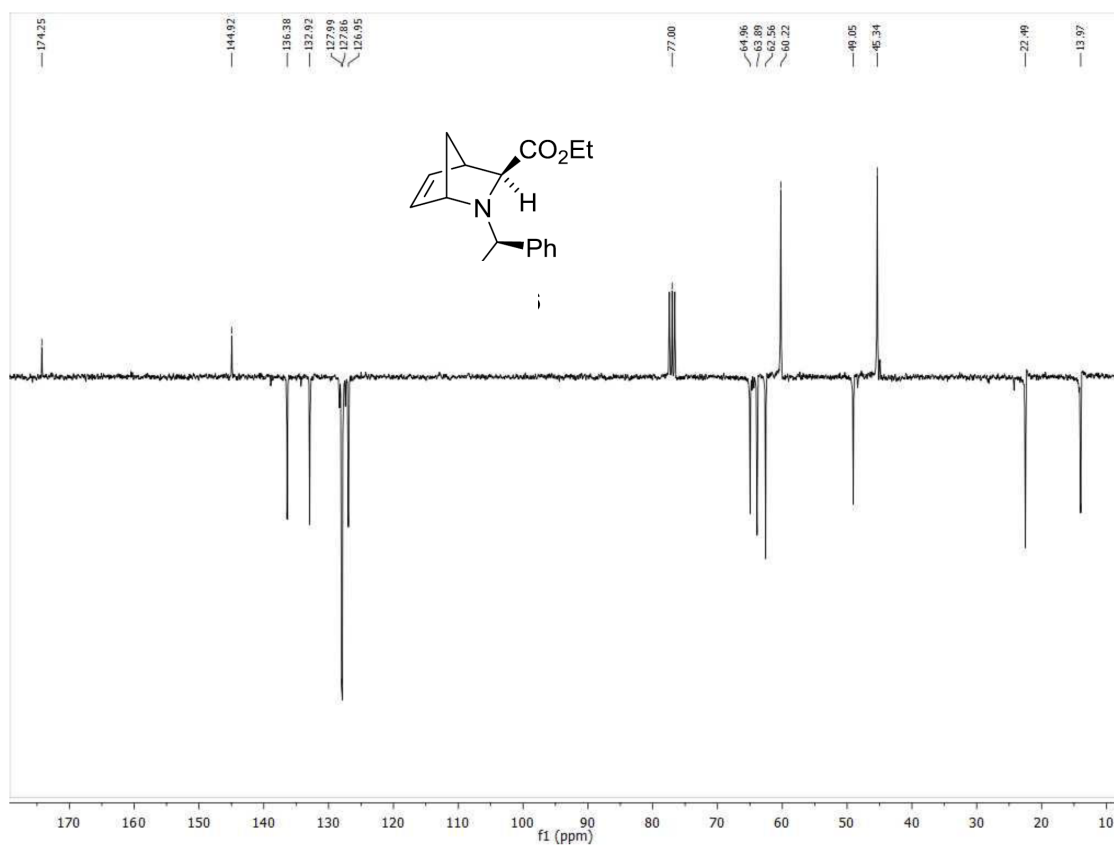

2.2.  $^1\text{H}$  (300 MHz,  $\text{CDCl}_3$ ) and  $^{13}\text{C}$  (75 MHz,  $\text{CDCl}_3$ ) spectra of 7b.

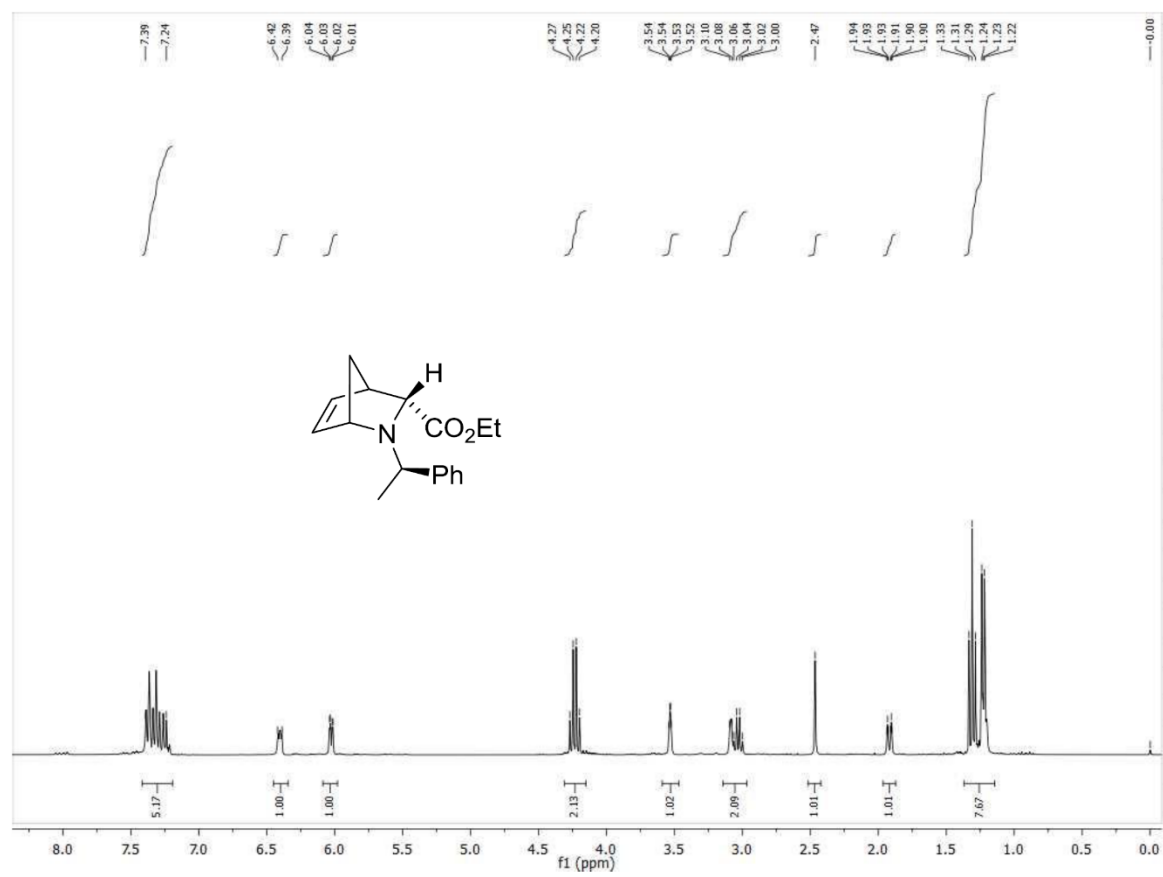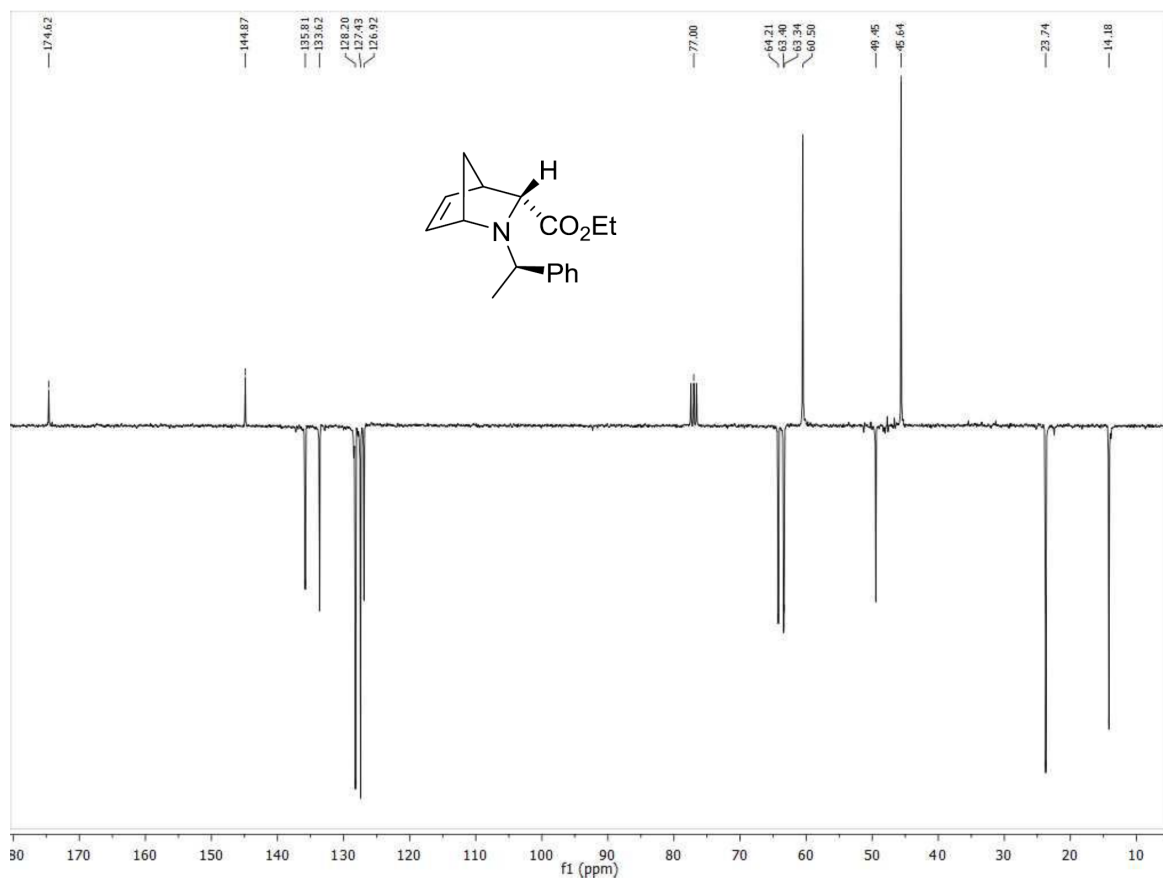



2.3.  $^1\text{H}$  (300 MHz,  $\text{CDCl}_3$ ) and  $^{13}\text{C}$  (75 MHz,  $\text{CDCl}_3$ ) spectra of 8.

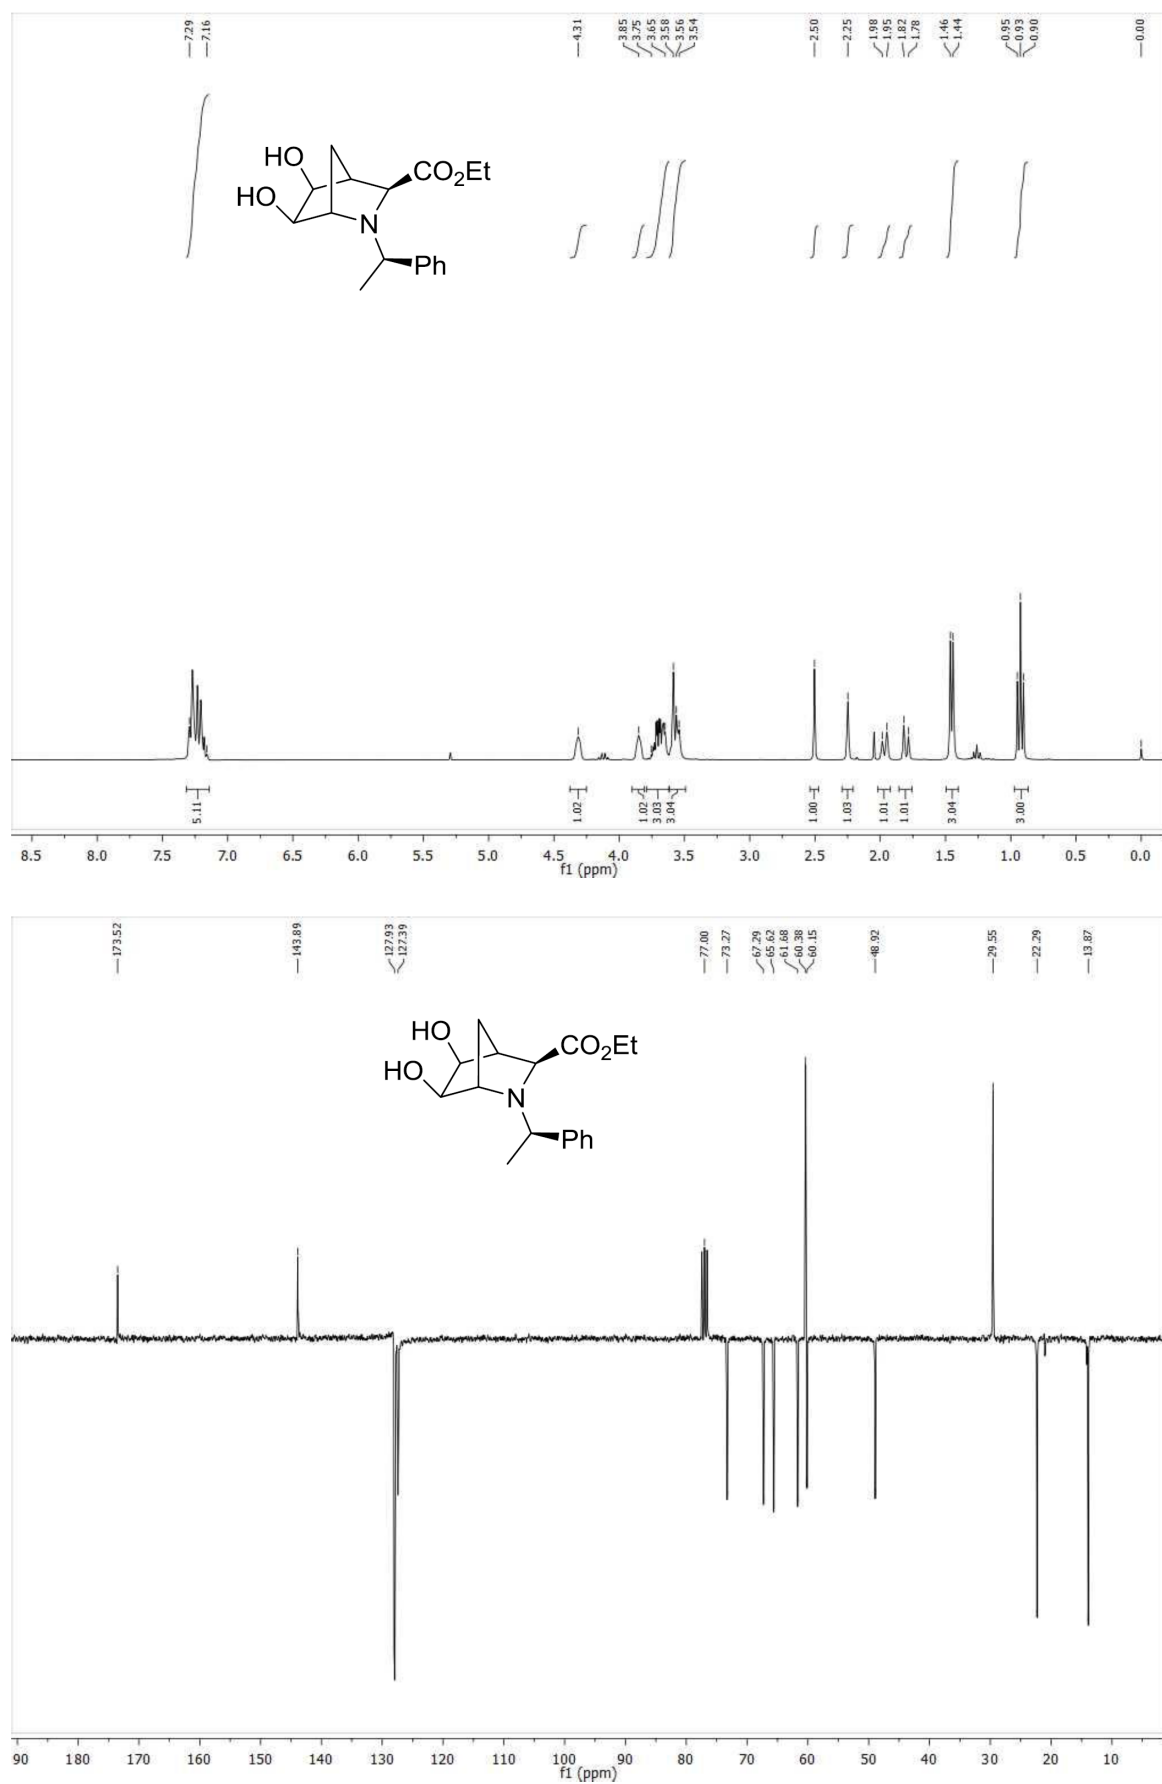

2.4.  $^1\text{H}$  (600 MHz,  $\text{CDCl}_3$ ) and  $^{13}\text{C}$  (150 MHz,  $\text{CDCl}_3$ ) spectra of 9.

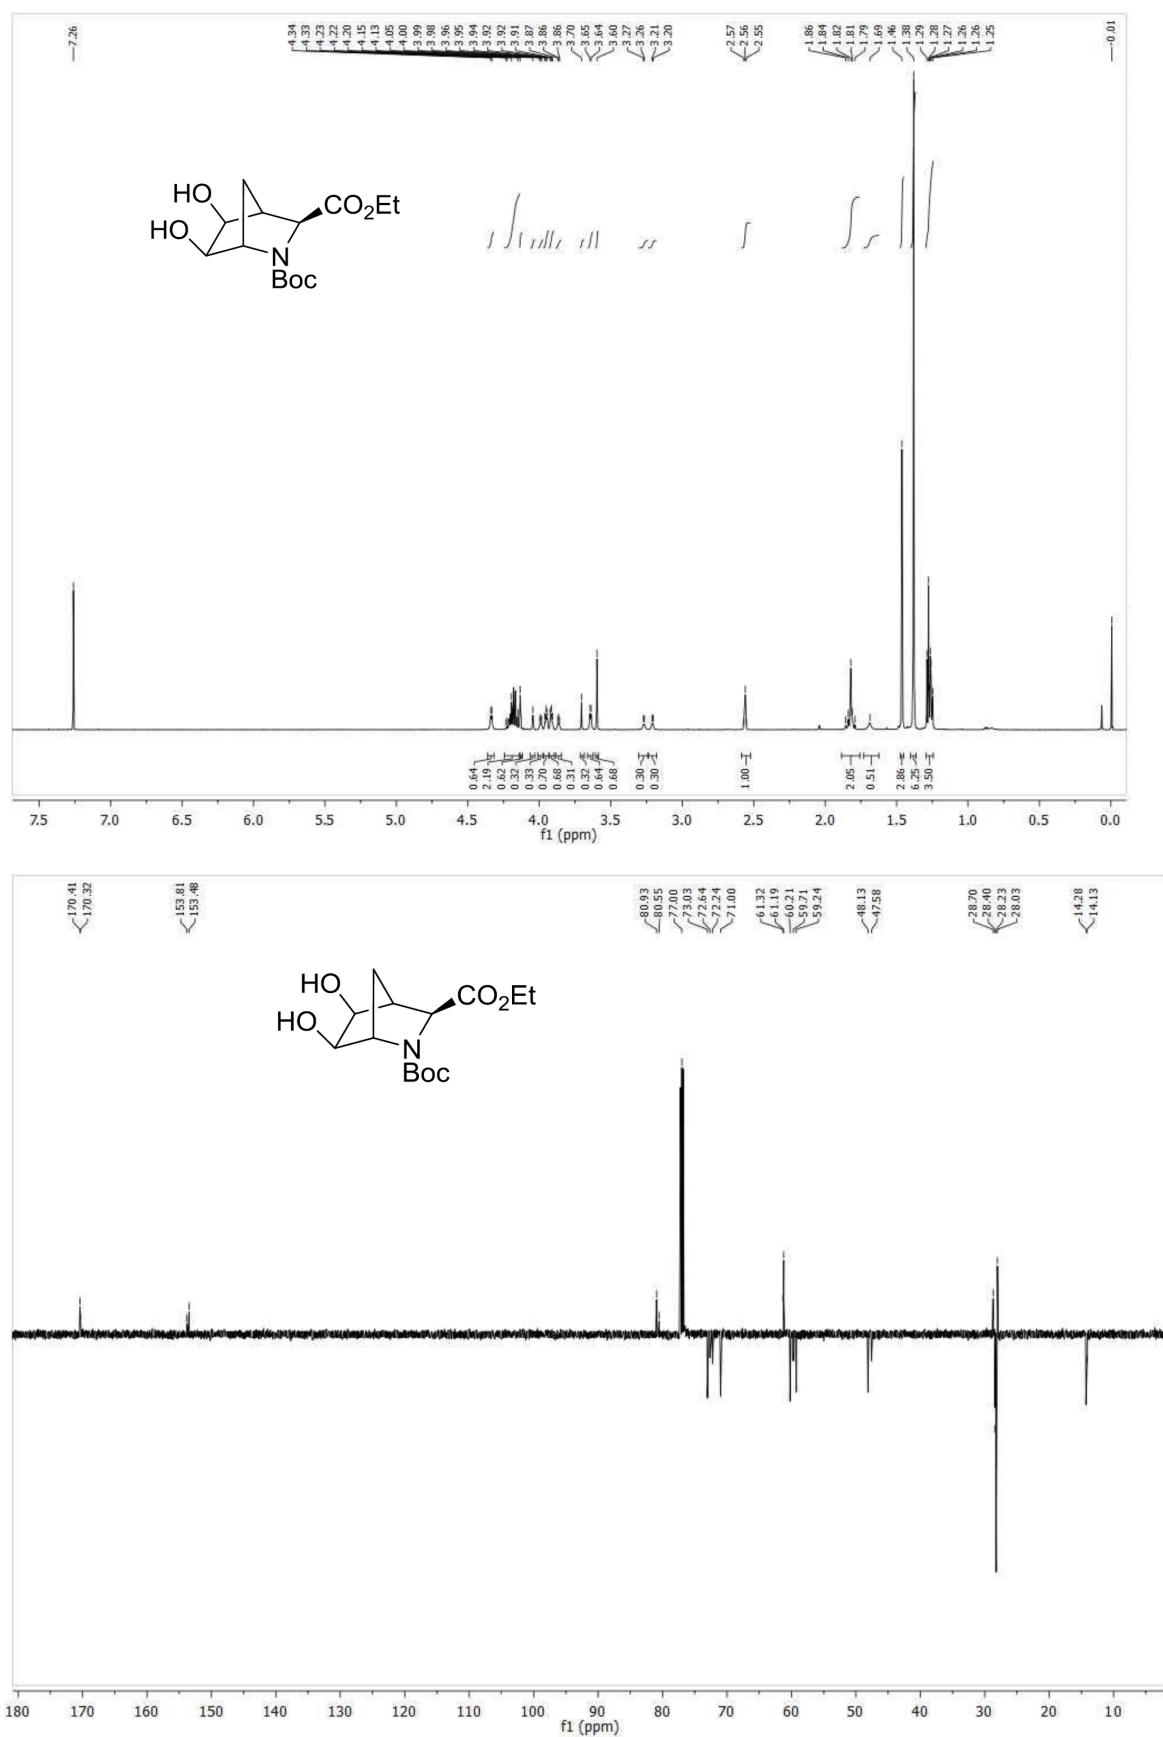

2.5.  $^1\text{H}$  (600 MHz,  $\text{CDCl}_3$ ) and  $^{13}\text{C}$  (150 MHz,  $\text{CDCl}_3$ ) spectra of 10.

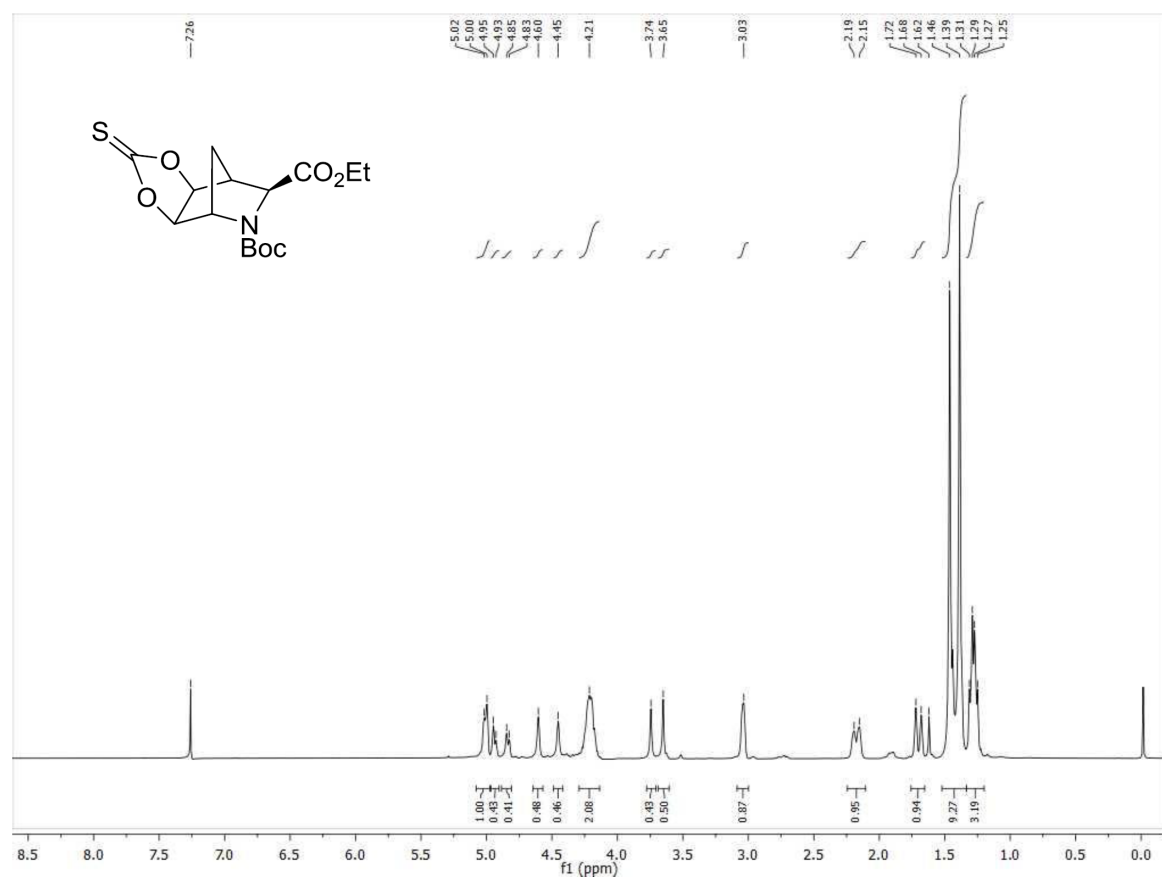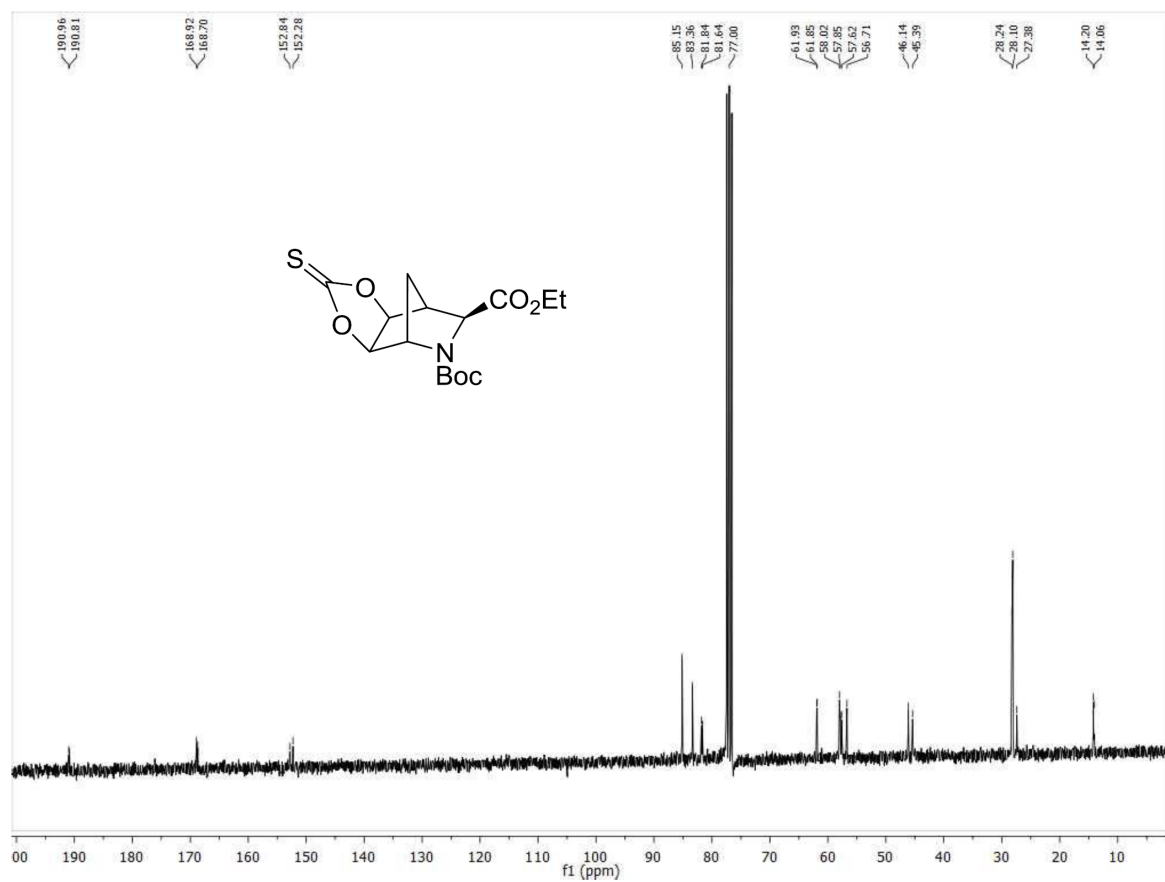

2.6.  $^1\text{H}$  (300 MHz,  $\text{CDCl}_3$ ) and  $^{13}\text{C}$  (75 MHz,  $\text{CDCl}_3$ ) spectra of 11.

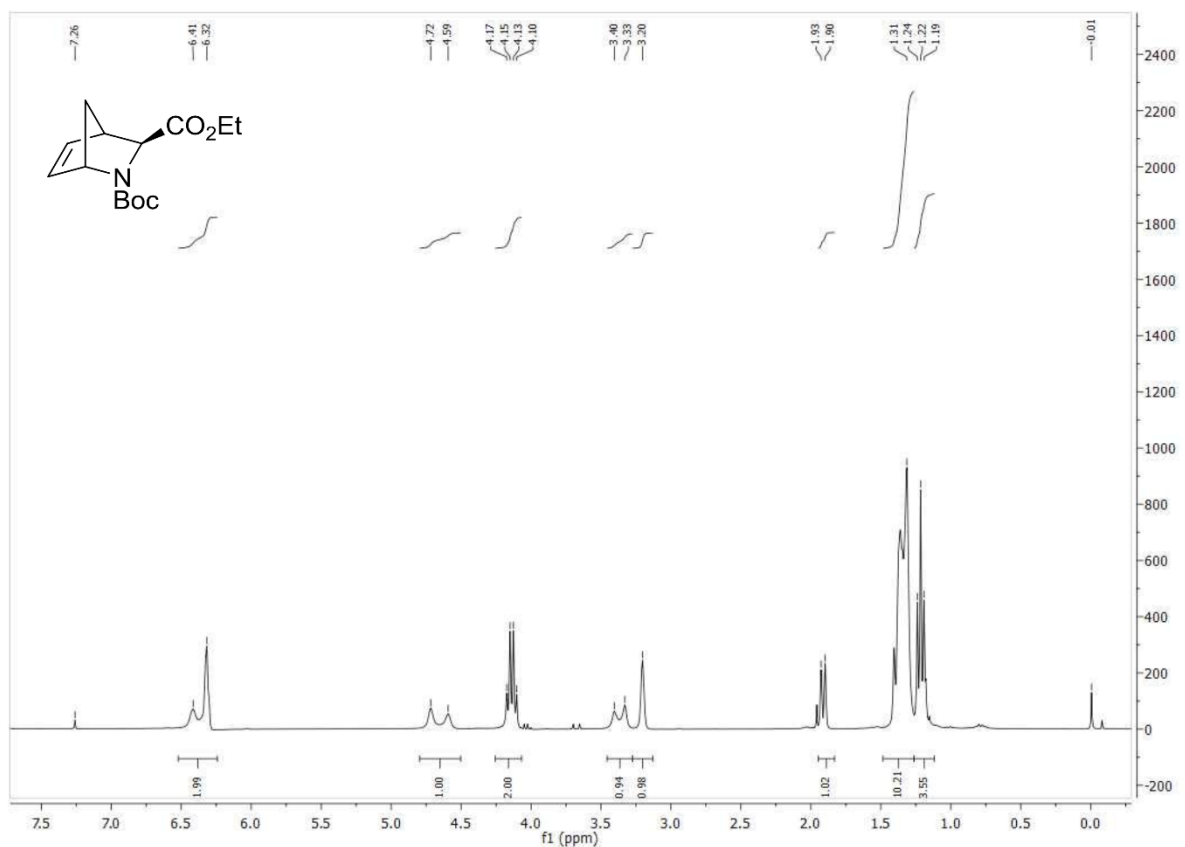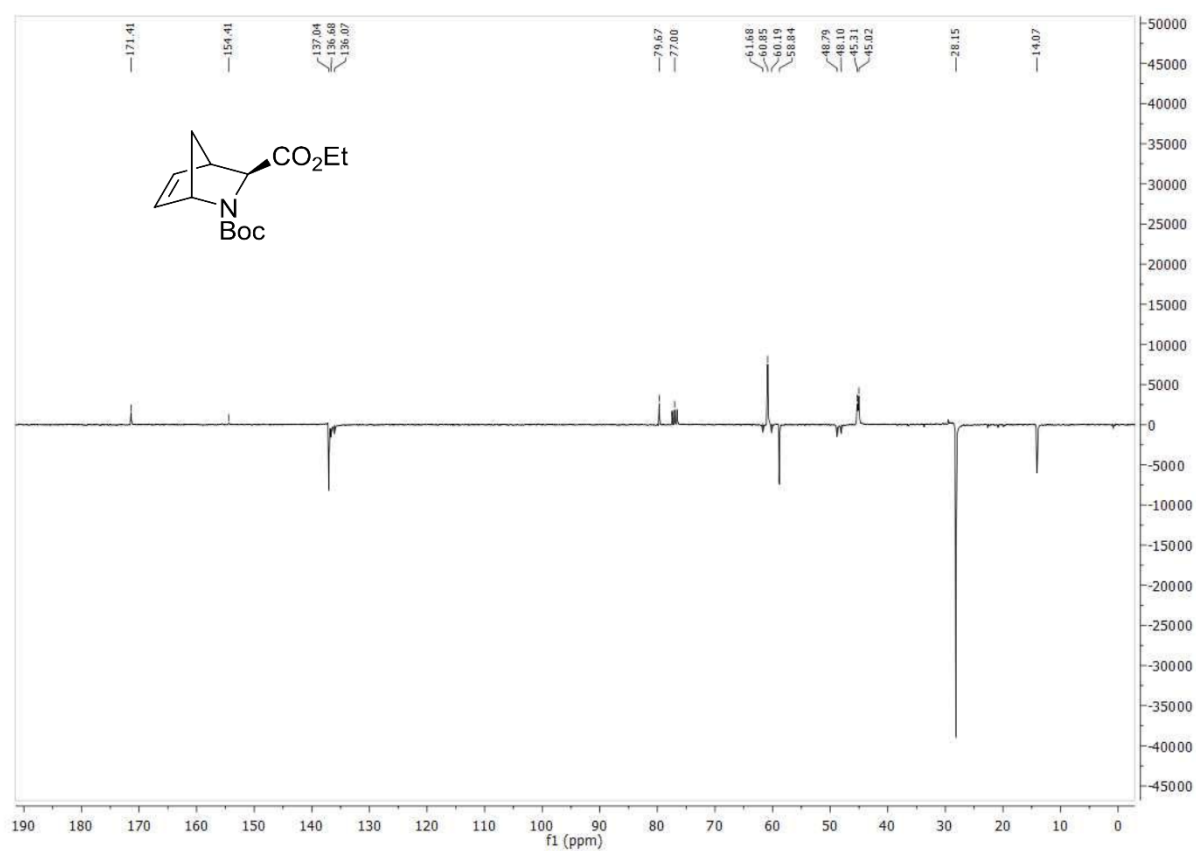

2.7.  $^1\text{H}$  (500 MHz,  $\text{CDCl}_3$ ) and  $^{13}\text{C}$  (125 MHz,  $\text{CDCl}_3$ ) spectra of 12.

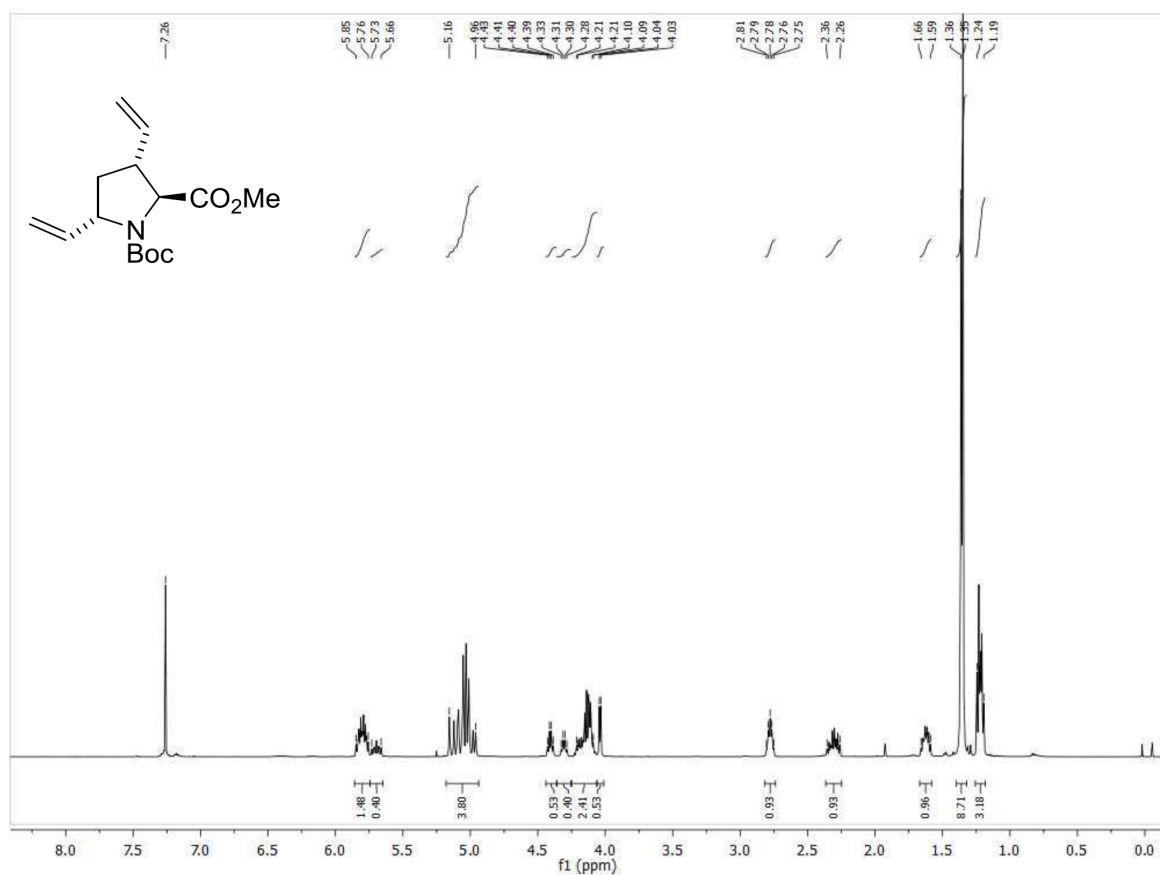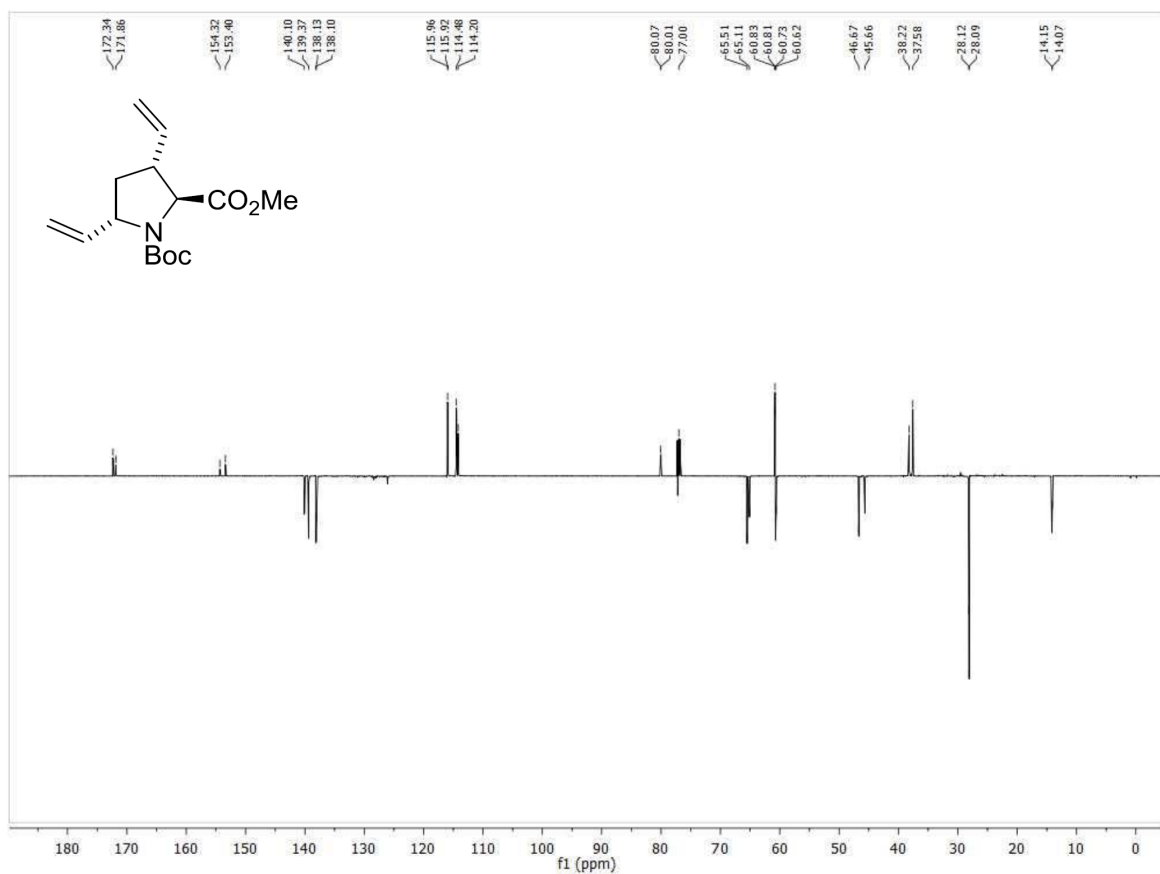

2.8.  $^1\text{H}$  (300 MHz,  $\text{CDCl}_3$ ) and  $^{13}\text{C}$  (75 MHz,  $\text{CDCl}_3$ ) spectra of 13.

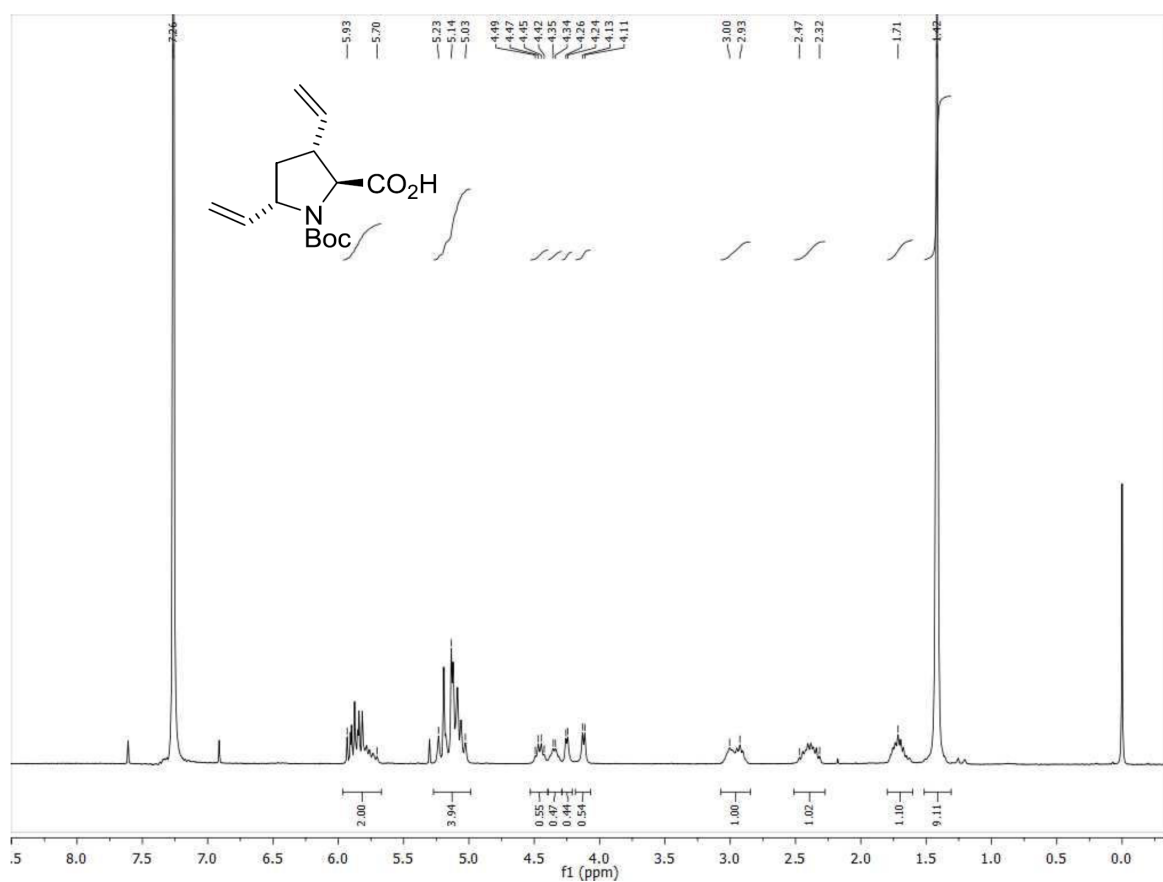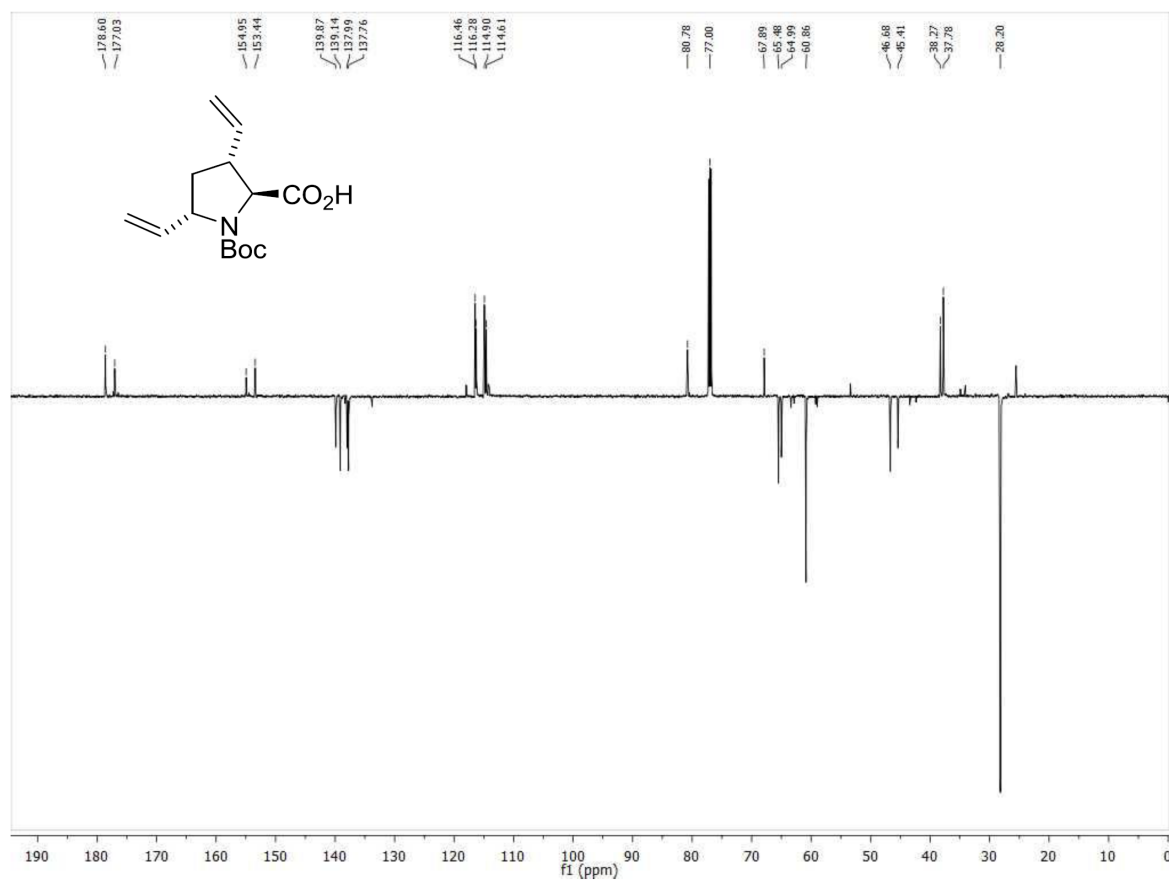

2.9.  $^1\text{H}$  (600 MHz,  $\text{CDCl}_3$ ) and  $^{13}\text{C}$  (150 MHz,  $\text{CDCl}_3$ ) spectra of 14.

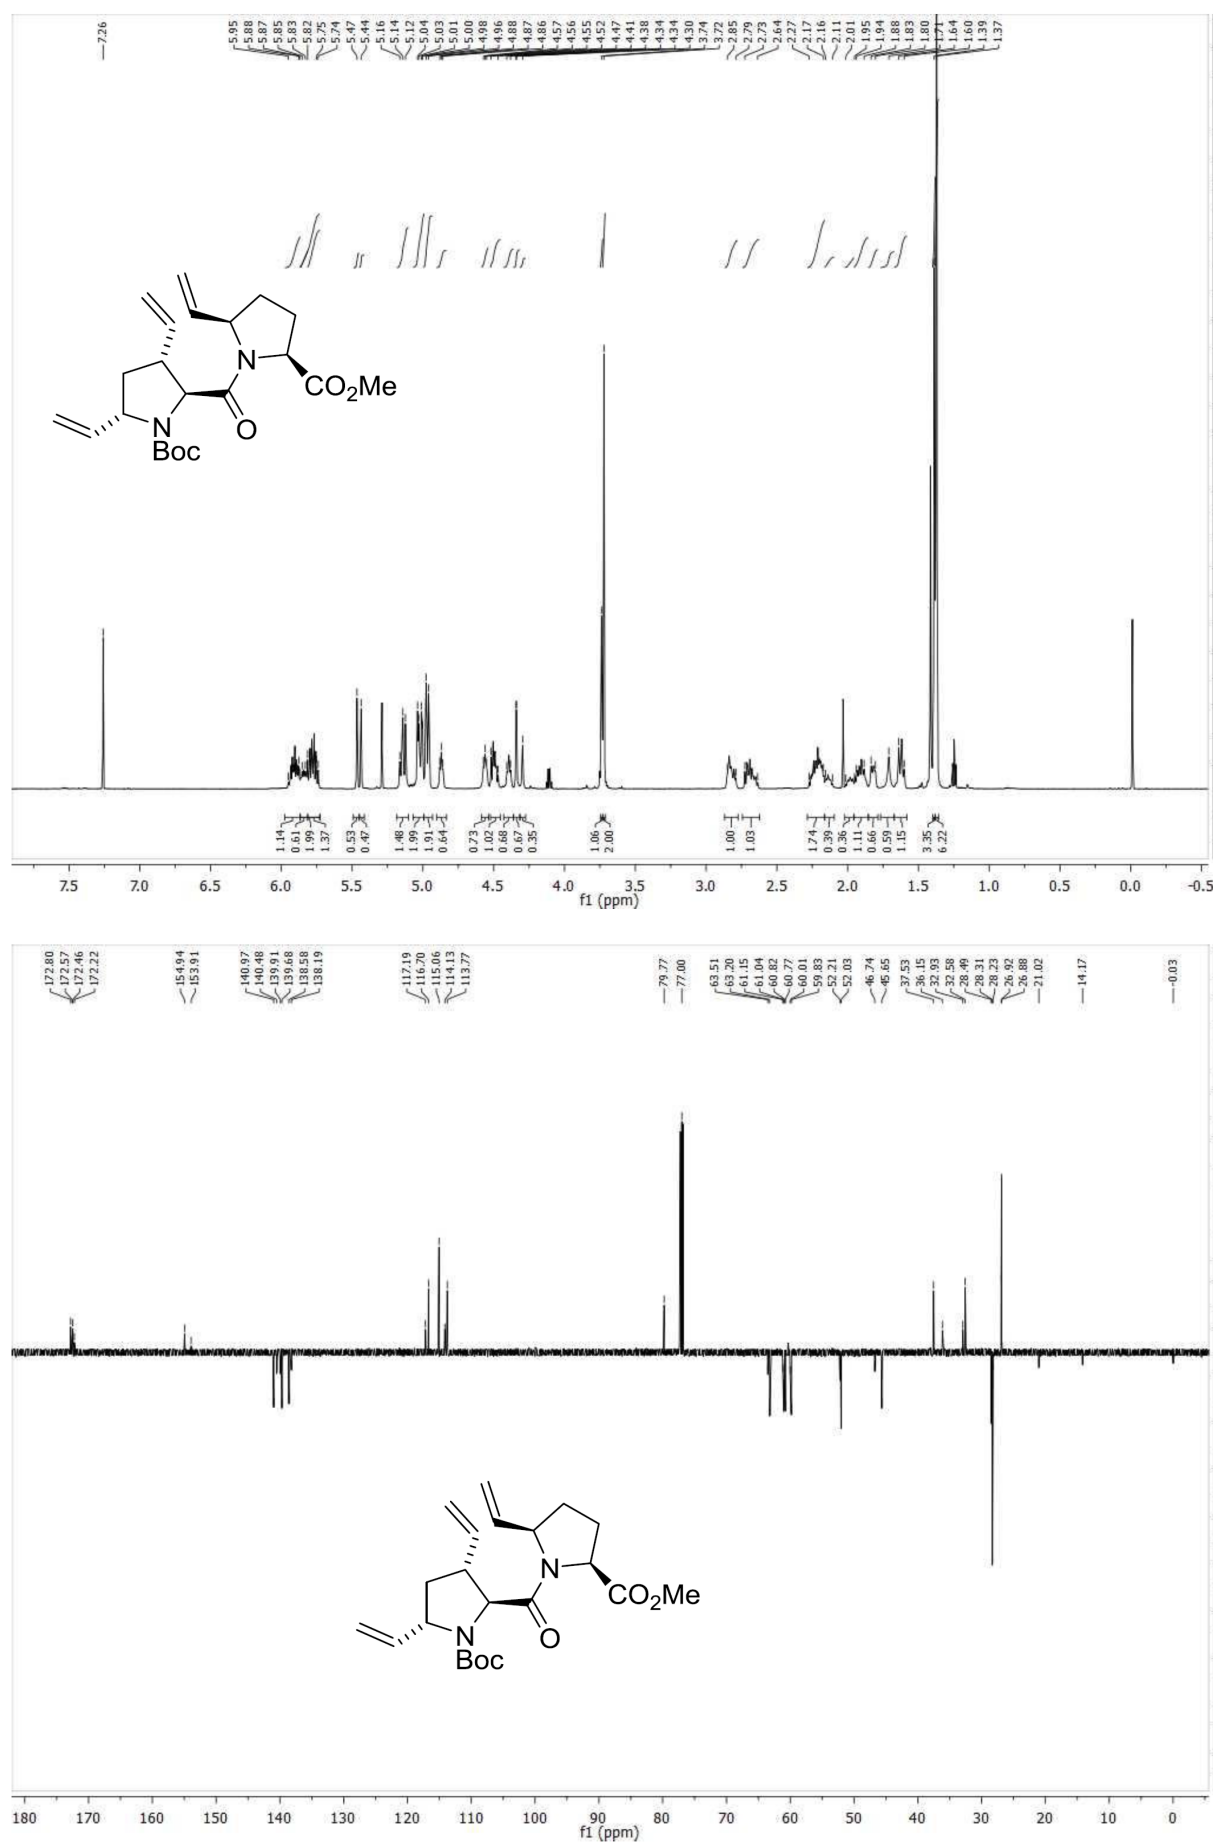

2.10.  $^1\text{H}$  (500 MHz,  $\text{CDCl}_3$ ) and  $^{13}\text{C}$  (125 MHz,  $\text{CDCl}_3$ ) spectra of 15.

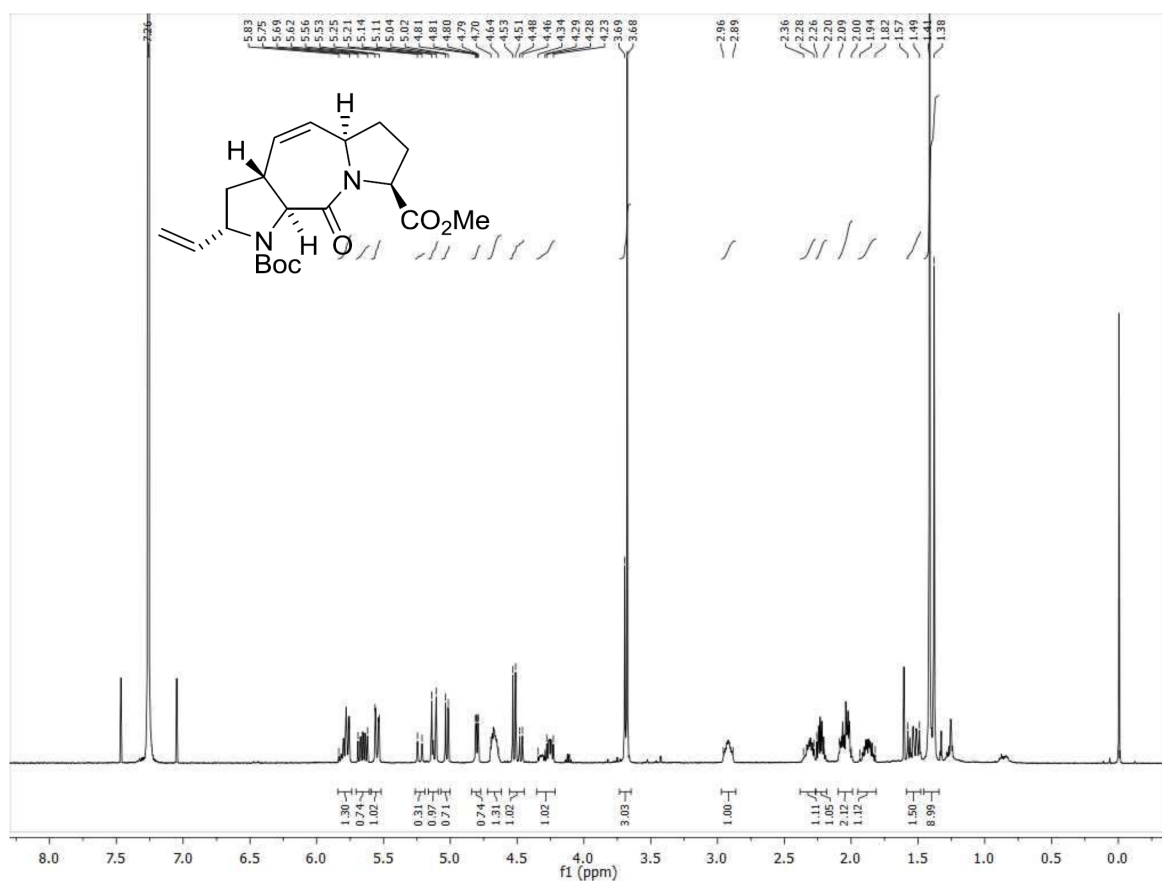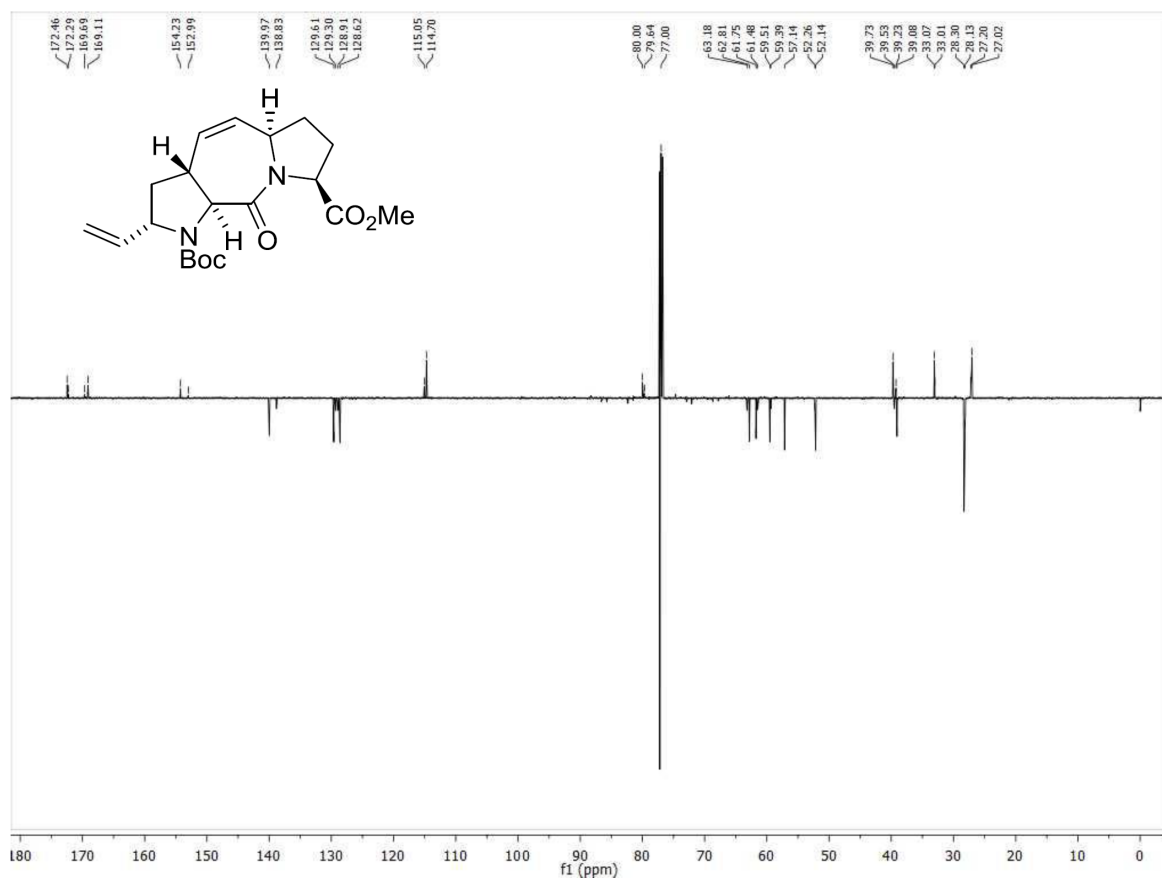



2.11.  $^1\text{H}$  (500 MHz,  $\text{CDCl}_3$ ) and  $^{13}\text{C}$  (125 MHz,  $\text{CDCl}_3$ ) spectra of 1.

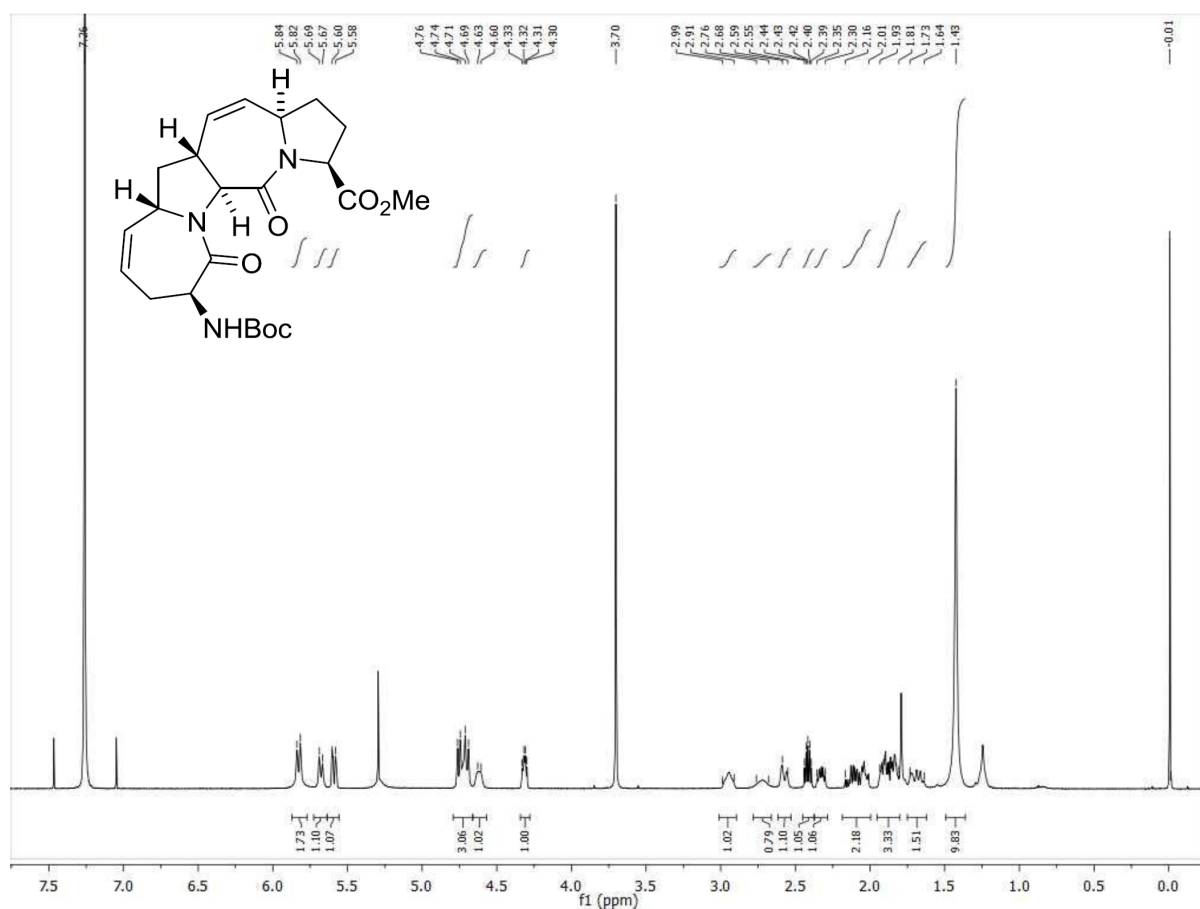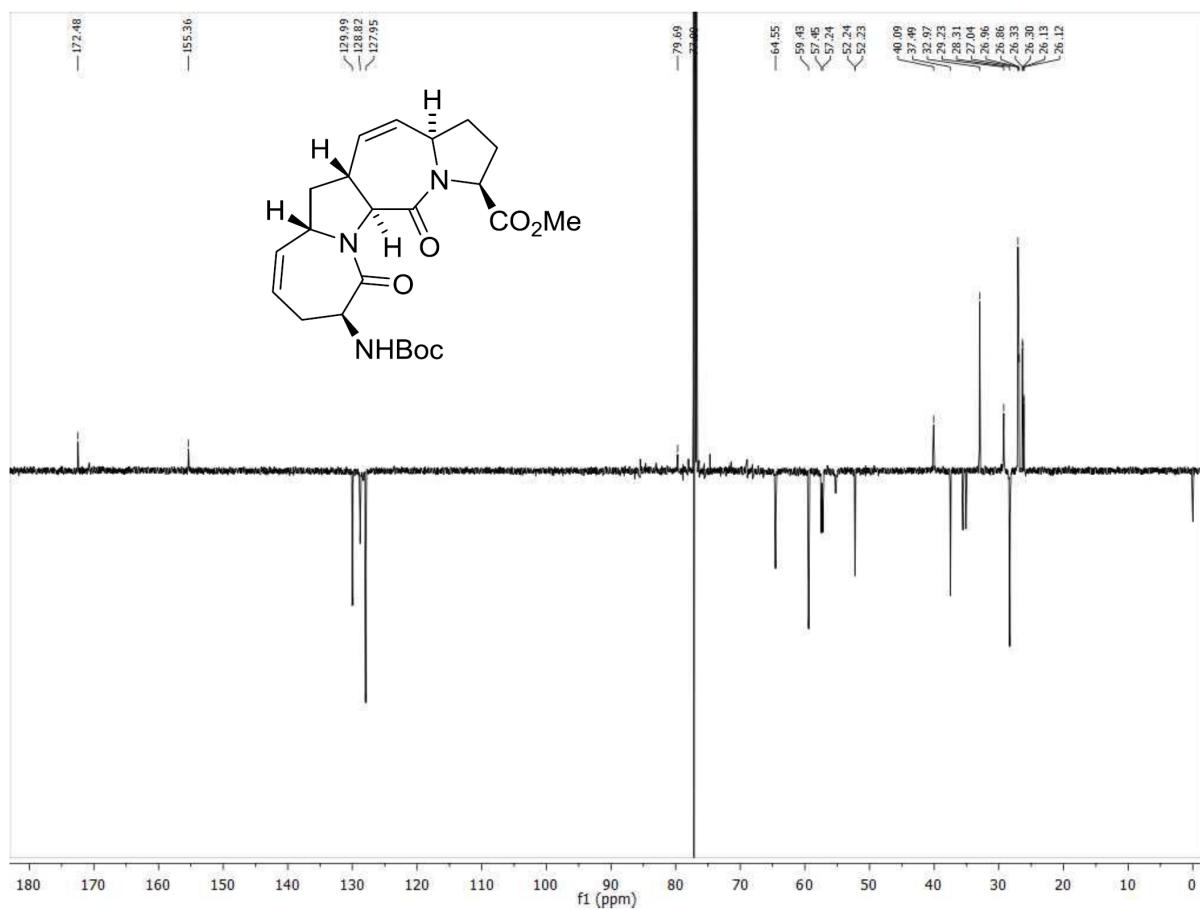

2.12.  $^1\text{H}$  (500 MHz,  $\text{CDCl}_3$ ) and  $^{13}\text{C}$  (125 MHz,  $\text{CDCl}_3$ ) spectra of 20.

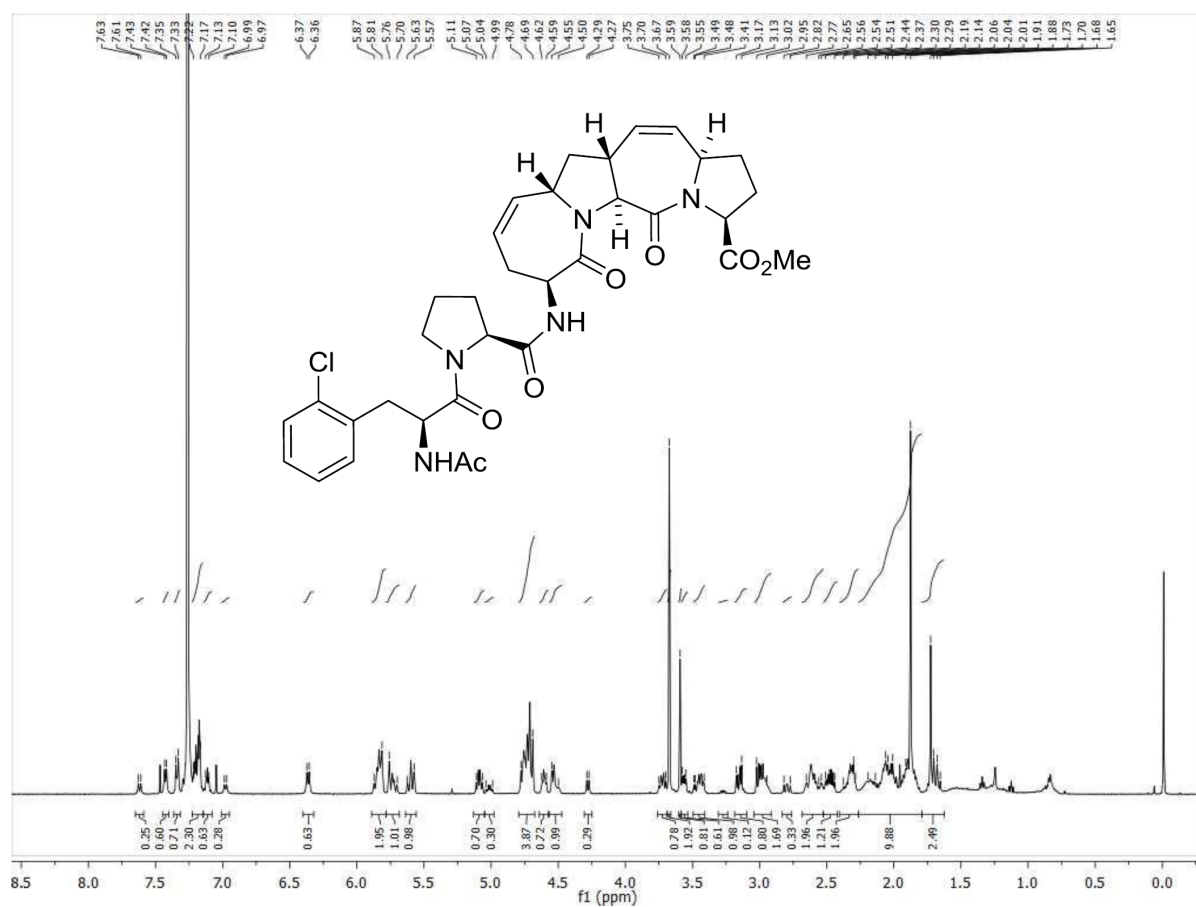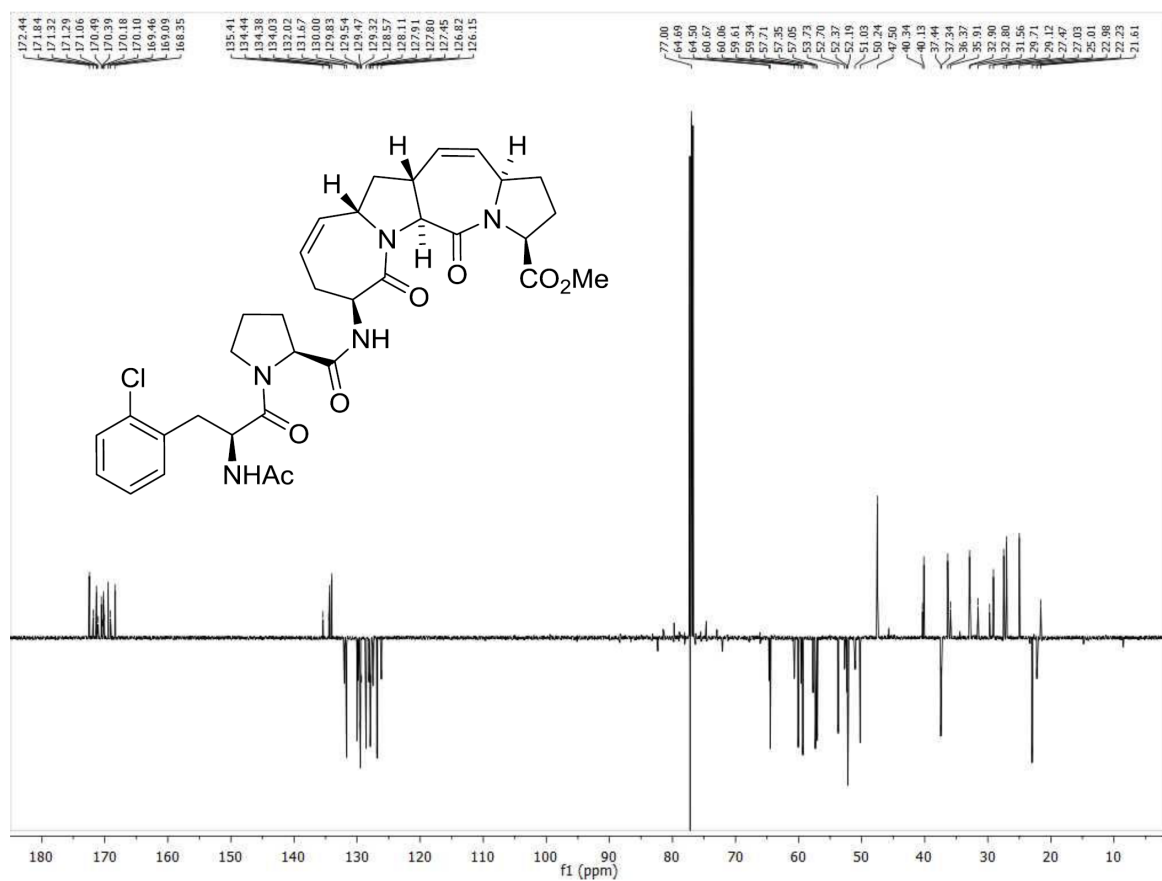

### 3.1. Crystal structure data and structure refinement for diol 9

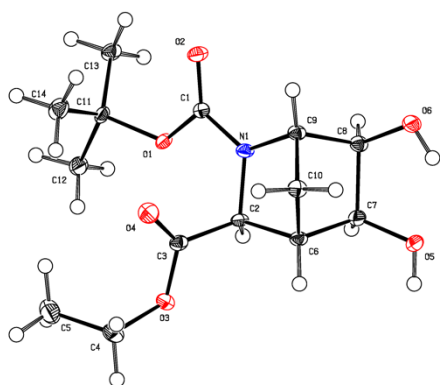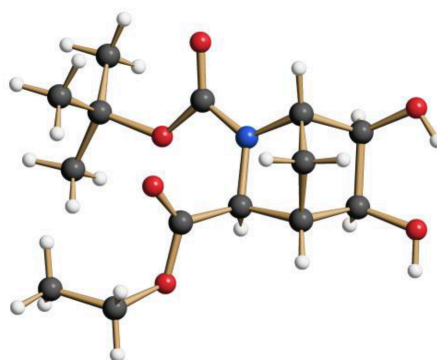

|                                   |                                                  |          |
|-----------------------------------|--------------------------------------------------|----------|
| Identification code               | mtk120n                                          |          |
| Empirical formula                 | C <sub>14</sub> H <sub>23</sub> N O <sub>6</sub> |          |
| Moiety formula                    | C <sub>14</sub> H <sub>23</sub> N O <sub>6</sub> |          |
| Formula weight                    | 301.33                                           |          |
| Temperature                       | 100(2) K                                         |          |
| Wavelength                        | 1.54178 Å                                        |          |
| Crystal system                    | Orthorhombic                                     |          |
| Space group                       | P2 <sub>1</sub> 2 <sub>1</sub> 2 <sub>1</sub>    |          |
| Unit cell dimensions              | a = 8.0019(3) Å                                  | α = 90°. |
|                                   | b = 10.5127(4) Å                                 | β = 90°. |
|                                   | c = 17.2834(6) Å                                 | γ = 90°. |
| Volume                            | 1453.91(9) Å <sup>3</sup>                        |          |
| Z                                 | 4                                                |          |
| Density (calculated)              | 1.377 Mg/m <sup>3</sup>                          |          |
| Absorption coefficient            | 0.900 mm <sup>-1</sup>                           |          |
| F(000)                            | 648                                              |          |
| Crystal size                      | 0.200 x 0.150 x 0.070 mm <sup>3</sup>            |          |
| Theta range for data collection   | 4.924 to 71.961°.                                |          |
| Index ranges                      | -9 ≤ h ≤ 9, -12 ≤ k ≤ 12, -21 ≤ l ≤ 21           |          |
| Reflections collected             | 24294                                            |          |
| Independent reflections           | 2851 [R(int) = 0.0373]                           |          |
| Completeness to theta = 67.679°   | 99.9 %                                           |          |
| Absorption correction             | Semi-empirical from equivalents                  |          |
| Max. and min. transmission        | 0.7535 and 0.5505                                |          |
| Refinement method                 | Full-matrix least-squares on F <sup>2</sup>      |          |
| Data / restraints / parameters    | 2851 / 0 / 202                                   |          |
| Goodness-of-fit on F <sup>2</sup> | 1.066                                            |          |
| Final R indices [I > 2σ(I)]       | R1 = 0.0256, wR2 = 0.0644                        |          |
| R indices (all data)              | R1 = 0.0258, wR2 = 0.0646                        |          |
| Absolute structure parameter      | 0.07(3)                                          |          |
| Extinction coefficient            | n/a                                              |          |
| Largest diff. peak and hole       | 0.152 and -0.184 e.Å <sup>-3</sup>               |          |
